# Supplementary material for: Large-Scale Chemical Similarity Networks for Target Profiling of Compounds Identified in Cell-Based Chemical Screens
Source: PubMed Central journal article supplement (PMC4380459; doi:10.1371/journal.pcbi.1004153), 2015-03-31

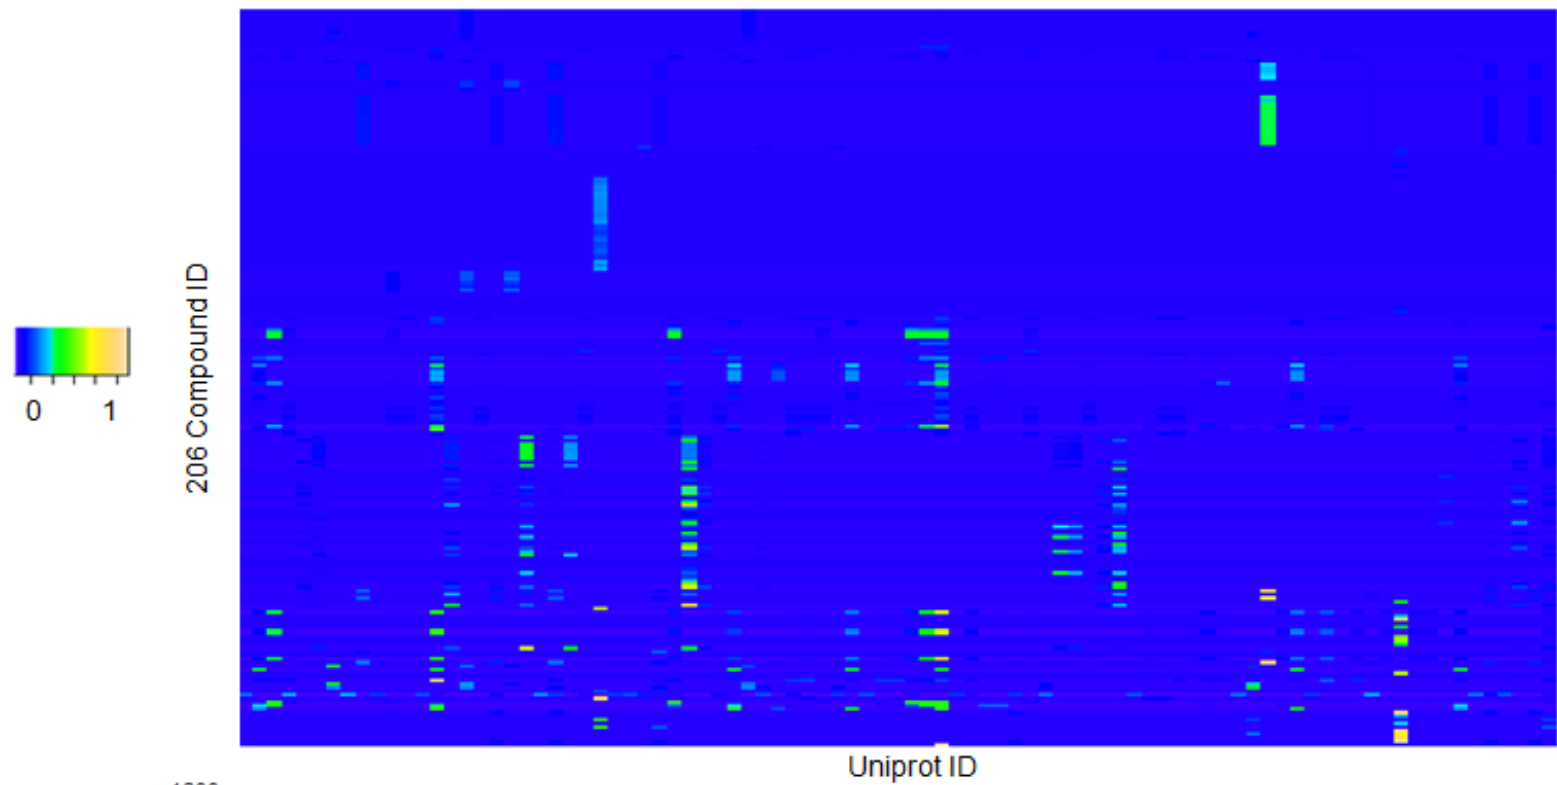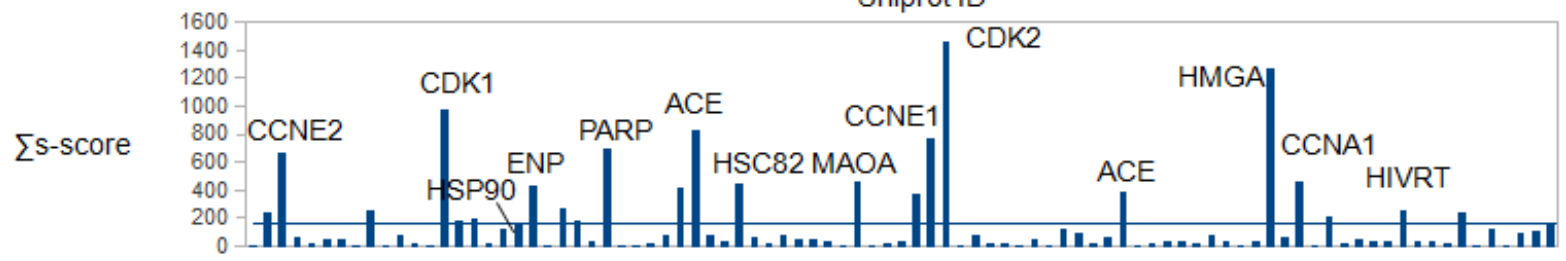

Supplement: pcbi.1004153.s002.pdf [file pcbi.1004153.s002.pdf]
