# Supplementary material for: Large-Scale Chemical Similarity Networks for Target Profiling of Compounds Identified in Cell-Based Chemical Screens
Source: PubMed Central journal article supplement (PMC4380459; doi:10.1371/journal.pcbi.1004153), 2015-03-31
Supplement: pcbi.1004153.s003.pdf [file pcbi.1004153.s003.pdf]

**212 mitotic compounds**

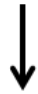

*CSNAP target prediction*

**116 target IDs**

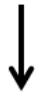

*LTIF analysis ( $\sum S\text{-score} > 10$ )*

**20 target IDs**

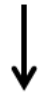

*Mitochek database search*

**14 target induced mitotic phenotypes**

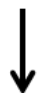

*Comparison of compound-  
Induced phenotype*

**Compound deconvolution**
