# Supplementary material for: Large-Scale Chemical Similarity Networks for Target Profiling of Compounds Identified in Cell-Based Chemical Screens
Source: PubMed Central journal article supplement (PMC4380459; doi:10.1371/journal.pcbi.1004153), 2015-03-31
Supplement: pcbi.1004153.s006.pdf [file pcbi.1004153.s006.pdf]

nuclei stay close together  
 strange nuclear shape  
 segregation problems  
 cell migration  
 metaphase delay  
 cell death  
 metaphase alignment problems  
 pulsating nuclei  
 small nucleus  
 prometaphase delay  
 condensation followed by decon  
 large nucleus  
 failure in decondensation  
 condensation without mitosis  
 binuclear  
 polylobed  
 large  
 dynamic changes  
 mitotic delay  
 grape  
 migration (speed)  
 migration (distance)  
 increased proliferation  
 strong inhibition of secretion  
 mild inhibition of secretion  
 inhibition of secretion  
 enhanced secretion  
 altered gal30 morphology  
 altered cop1 morphology  
 altered cop1 morphology  
 retention of shi(chaspb)-gfp  
 retention of shi(yes)-mcherry  
 reduction in ir-induced 53kpi  
 reduction in ir-induced 53kpi  
 accumulation of gfp-rmf168 on

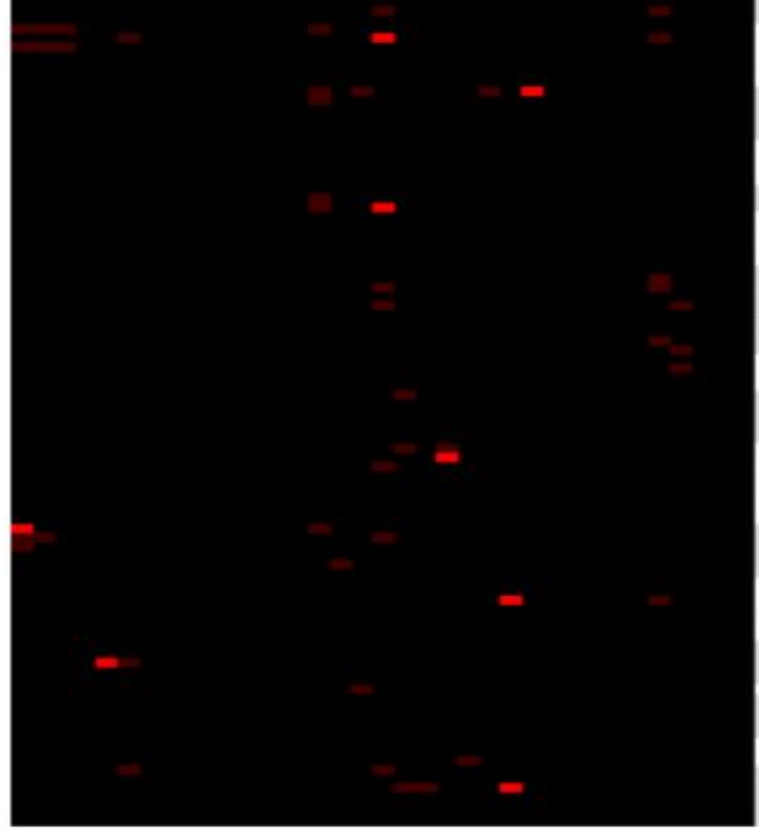

- PRC1L\_C04018.00001.P
- PRC1L\_C04018.00002.P
- PRC1L\_C04018.00003.P
- PRC1L\_C04018.00004.P
- PRC1L\_C04018.00005.P
- PRC1L\_C04018.00006.P
- PRC1L\_C04018.00007.P
- PRC1L\_C04018.00008.P
- PRC1L\_C04018.00009.P
- PRC1L\_C04018.00010.P
- PRC1L\_C04018.00011.P
- PRC1L\_C04018.00012.P
- PRC1L\_C04018.00013.P
- PRC1L\_C04018.00014.P
- PRC1L\_C04018.00015.P
- PRC1L\_C04018.00016.P
- PRC1L\_C04018.00017.P
- PRC1L\_C04018.00018.P
- PRC1L\_C04018.00019.P
- PRC1L\_C04018.00020.P
- PRC1L\_C04018.00021.P
- PRC1L\_C04018.00022.P
- PRC1L\_C04018.00023.P
- PRC1L\_C04018.00024.P
- PRC1L\_C04018.00025.P
- PRC1L\_C04018.00026.P
- PRC1L\_C04018.00027.P
- PRC1L\_C04018.00028.P
- PRC1L\_C04018.00029.P
- PRC1L\_C04018.00030.P
- PRC1L\_C04018.00031.P
- PRC1L\_C04018.00032.P
- PRC1L\_C04018.00033.P
- PRC1L\_C04018.00034.P
- PRC1L\_C04018.00035.P
- PRC1L\_C04018.00036.P
- PRC1L\_C04018.00037.P
- PRC1L\_C04018.00038.P
- PRC1L\_C04018.00039.P
- PRC1L\_C04018.00040.P
- PRC1L\_C04018.00041.P
- PRC1L\_C04018.00042.P
- PRC1L\_C04018.00043.P
- PRC1L\_C04018.00044.P
- PRC1L\_C04018.00045.P
- PRC1L\_C04018.00046.P
- PRC1L\_C04018.00047.P
- PRC1L\_C04018.00048.P
- PRC1L\_C04018.00049.P
- PRC1L\_C04018.00050.P
- PRC1L\_C04018.00051.P
- PRC1L\_C04018.00052.P
- PRC1L\_C04018.00053.P
- PRC1L\_C04018.00054.P
- PRC1L\_C04018.00055.P
- PRC1L\_C04018.00056.P
- PRC1L\_C04018.00057.P
- PRC1L\_C04018.00058.P
- PRC1L\_C04018.00059.P
- PRC1L\_C04018.00060.P
- PRC1L\_C04018.00061.P
- PRC1L\_C04018.00062.P
- PRC1L\_C04018.00063.P
- PRC1L\_C04018.00064.P
- PRC1L\_C04018.00065.P
- PRC1L\_C04018.00066.P
- PRC1L\_C04018.00067.P
- PRC1L\_C04018.00068.P
- PRC1L\_C04018.00069.P
- PRC1L\_C04018.00070.P
- PRC1L\_C04018.00071.P
- PRC1L\_C04018.00072.P
- PRC1L\_C04018.00073.P
- PRC1L\_C04018.00074.P
- PRC1L\_C04018.00075.P
- PRC1L\_C04018.00076.P
- PRC1L\_C04018.00077.P
- PRC1L\_C04018.00078.P
- PRC1L\_C04018.00079.P
- PRC1L\_C04018.00080.P
- PRC1L\_C04018.00081.P
- PRC1L\_C04018.00082.P
- PRC1L\_C04018.00083.P
- PRC1L\_C04018.00084.P
- PRC1L\_C04018.00085.P
- PRC1L\_C04018.00086.P
- PRC1L\_C04018.00087.P
- PRC1L\_C04018.00088.P
- PRC1L\_C04018.00089.P
- PRC1L\_C04018.00090.P
- PRC1L\_C04018.00091.P
- PRC1L\_C04018.00092.P
- PRC1L\_C04018.00093.P
- PRC1L\_C04018.00094.P
- PRC1L\_C04018.00095.P
- PRC1L\_C04018.00096.P
- PRC1L\_C04018.00097.P
- PRC1L\_C04018.00098.P
- PRC1L\_C04018.00099.P
- PRC1L\_C04018.00100.P

- SCD
- FADS2
- ABL1
- TUBA1A
- TUBB
- FYN
- PTPRC
- MAPT
- ACP1
- PTPN7
- TUBA4A
- PTPN12
- TUBB3
- TUBA3D
- TUBA8A
- TUBB1
- PTPN22
