# Supplementary material for: Large-Scale Chemical Similarity Networks for Target Profiling of Compounds Identified in Cell-Based Chemical Screens
Source: PLoS Comput Biol. 2015 Mar 31;11(3):e1004153. doi: 10.1371/journal.pcbi.1004153 (PMC4380459; doi:10.1371/journal.pcbi.1004153)
Supplement: S3 Table — The effect of the 212 mitotic compounds on microtubule assembly was analyzed using an in-vitro tubulin polymerization assay. The end-point absorbance based on change in OD (dOD) was used to quantify the degree of microtubule polymerization and was converted to percentage fold change relative to DMSO (0%). The percentage fold change is listed for each compound. (XLS) [file pcbi.1004153.s016.xls]

## Sheet: Sheet1
212 Mitotic Sets
Compound ID	SMILES	% Fold
ASN 05543919	Cc1cccc2cc3c(N)c(sc3nc12)C(=O)Nc1ccccc1N1CCOCC1	411.041
ASN 05548413	CCc1cc2cc3OCOc3cc2nc1SCC(=O)NCCc1ccccc1	387.343
ASN 03109151	COc1ccccc1NC(=S)N(Cc1ccccc1)Cc1cc2ccc(C)cc2[nH]c1=O	272.16
T6012571	Cc1cc2nc(/C=C/c3ccsc3)sc2cc1C	236.647
T5607731	CCS(=O)(=O)N1CCc2cc(ccc12)C1=NN=C(NCc2ccc3OCOc3c2)SC1	227.365
5566411	COc1ccc(Cc2cnc(NC(=O)c3sc4ccccc4c3Cl)s2)cc1	169.015
ASN 04394978	Cc1cccc(C)c1NC(=O)CSc1nc2cc3OCOc3cc2cc1C	144.52
ASN 04371235	Cc1cc2cc3OCCOc3cc2nc1SCC(=O)NCCc1ccccc1	129.765
ASN 04051695	CCOc1ccc(cc1)C1=[NH+]c2ccccc2C(=NN1)c1cccnc1	109.424
T5704985	COc1ccccc1Nc1nc(cs1)c1ccc(cc1)S(=O)(=O)C	104.008
ASN 05547057	CCc1cc2cc(OC)ccc2nc1SCC(=O)Nc1ccccc1C	103.837
Paclitaxel	C12C(OC(=O)c3ccccc3)C3(O)CC(OC(=O)C(O)C(NC(=O)c4ccccc4)c4ccccc4)C(=C(C(OC(=O)C)C(=O)C1(C)C(O)CC1OCC21OC(=O)C)C3(C)C)C	103.334
5120754	Cc1ccc2nc(cn2c1)c1ccc(I)cc1	100.855
ASN 03156621	Cc1ccc(NC(=S)N(CC2CCCO2)Cc2cc3ccc(C)cc3[nH]c2=O)cc1	97.9098
5688246	COc1cc(cc(OC)c1OC)c1onc2ccc(Cl)cc12	95.1987
ASN 05106929	COc1ccc2cc(CN(Cc3ccco3)C(=O)c3cccs3)c(=O)[nH]c2c1	91.1881
T6141719	COc1ccc(Br)cc1c1nc(CN2C(=O)NC(C)(C2=O)c2ccccc2)cs1	88.7557
5576046	Cc1cccc(Cc2cnc(NC(=O)c3sc4ccccc4c3Cl)s2)c1	81.6825
5651851	COc1cc(Br)c(cc1OC)c1cc2cc(Cl)ccc2oc1=O	77.7292
AST 6416643	O=C(Nc1ccc2OCCOc2c1)C(=O)Nc1cccc2cccnc12	76.0243
T5595443	COc1cc2CCN(C(c3cccs3)c2cc1OC)C(=O)Nc1ccc(Cl)cc1	70.5467
ASN 05446147	Cc1ccccc1NC(=O)CSc1nc2cc3CCCc3cc2cc1C	69.2964
ASN 05446217	Cc1cc2cc3CCCc3cc2nc1SCC(=O)NC(C)(C)C	63.4292
5280344	Nc1c(sc2nc3CCCCc3cc12)C(=O)c1ccccc1	59.7025
AST 5588826	CCc1ccccc1NC(=O)CSc1nc2cc3OCOc3cc2cc1C#N	56.6166
AST 5546340	Cc1ccc(C)c(NC(=O)CSc2nc3cc4OCOc4cc3cc2C#N)c1	52.5544
ASN 07185075	Cc1cc2nc([nH]c2cc1C)c1ccc(SCC#N)nc1	51.783
T5827536	Cc1ccc(Nc2nc(N)nc(CN3C(=O)NC(C)(C3=O)c3ccccc3)n2)cc1	48.1077
T6108410	Clc1ccc2sc(/C=C/c3cccnc3)nc2c1	47.1383
ASN 05113189	COc1ccc2cc(CN(Cc3ccco3)C(=O)Nc3ccccc3OC)c(=O)[nH]c2c1	43.9135
T5881009	Cc1cc2nc(/C=C/c3cccs3)sc2cc1C	43.0762
T5710303	COc1cccc(/C=C(/Cl)\c2nc3cc(OC)c(OC)cc3c(=O)[nH]2)c1	42.1273
5705516	O=c1[nH]c(/C=C\c2ccccc2)nc2ccccc12	40.5382
ASN 07462790	Cc1cc2n(C)c(cc2s1)C(=O)OCC(=O)NCc1ccco1	39.4255
T5741483	CCS(=O)(=O)N1CCc2cc(ccc12)C(=O)Cn1cnc2sc(C)c(c2c1=O)c1ccccc1	38.2993
T5758223	O=C(Nc1ccc(cc1)N1CCCCCC1)C1COc2ccccc2C1	37.6601
T6137861	Fc1cccc2sc(C(=O)NC3=NCCS3)c(COc3ccccc3)c12	34.1991
ASN 05111202	COc1ccc(NC(=O)N(CC2CCCO2)Cc2cc3ccc(C)c(C)c3[nH]c2=O)cc1	33.2969
T5585938	O=c1[nH]c(CSc2nnc(C3CC3)n2C2CC2)nc2sc(cc12)c1ccccc1	31.8371
AEM 10039188	COc1ccc(CNc2c(nc3cnccn23)c2ccc(O)cc2O)cc1	30.8304
5646967	CC(=O)Nc1ccc(Nc2nc(cs2)c2c(C)nc3ccccn23)cc1	30.8102
T6147335	CCc1noc(CSc2ncnc3scc(c4ccc(C)cc4)c23)n1	30.2326
5720020	O=C(N/N=C/c1ccc2CCc3cccc1c23)C1COc2ccccc2O1	28.4942
T6103144	Cc1nn(C)c2nc(C)cc(C(=O)Nc3nc4cc5OCCOc5cc4s3)c12	28.3751
T5816921	CC(=O)c1c(C)[nH]c(C(=O)Nc2ccc(cc2)N2CCCC2)c1C	27.5597
5326436	CN(C)c1ccc(cc1)/C=N/NC(=O)c1cccc(F)c1	27.5597
ASN 05102219	CCOc1ccc(cc1)C(=O)N(Cc1cccs1)Cc1cc2cc(C)ccc2[nH]c1=O	27.1992
5301107	Nc1cccc2C(=O)c3c(NC(=O)c4ccccc4)cccc3C(=O)c12	24.7112
AST 5588839	COc1ccc(NC(=O)CSc2nc3cc4OCOc4cc3cc2C#N)c(OC)c1	23.5669
ASN 05932195	Cc1ccc2[nH]c(=O)c(CN(CC3COCCO3)C(=O)Nc3ccccc3Cl)cc2c1	23.0826
5705511	Fc1ccccc1/C=C/c1nc2ccccc2c(=O)[nH]1	21.3215
ASN 05446115	COc1ccc(OC)c(NC(=O)CSc2nc3cc4CCCc4cc3cc2C)c1	20.509
T5756631	Fc1ccc(Cc2cnc(NC(=O)c3ccc4OCOc4c3)s2)cc1	20.0576
ASN 05546205	Cc1ccc2cc(C#N)c(SCC(=O)c3ccc(F)cc3)nc2c1C	20.0462
ASN 03800266	CCc1nnc(NC(=O)CSc2cc(C)c3cc(C)cc(C)c3n2)s1	19.7352
T6028385	Clc1ccc2OCC(Cc2c1)C(=O)Nc1ccc(cc1)N1CCCC1	19.234
5262045	COc1ccc(cc1)C1=NOC(=O)/C/1=N/Nc1ccc(Cl)cc1	19.0212
ASN 05588709	Clc1ccccc1NC(=O)CSc1nc2cc3OCCOc3cc2cc1C#N	17.2472
ASN 05113199	COc1ccc2cc(CN(Cc3cccs3)C(=O)Nc3ccccc3OC)c(=O)[nH]c2c1	17.1156
T5728815	O=c1[nH]c(/C=C/c2ccccc2)nc2sc3CCCCCc3c12	16.8129
T5870770	Cc1ccc(cn1)C(=O)Nc1nc2ccc(Oc3ccccc3)cc2s1	15.6025
T6092746	Cn1c(cc(Br)c1Br)C(=O)Nc1ccc(cc1)c1nccs1	15.473
T6122769	Brc1ccccc1C(=O)Nc1ccc(nc1)N1CCc2sccc2C1	14.9111
AST 5588336	COc1ccc2nc(SCC(=O)Nc3ccccc3Br)c(cc2c1)C#N	14.8279
ASN 03321889	CCOc1ccc2nc(SCC(=O)Nc3ccc(OC)cc3OC)c(C)cc2c1	14.4766
AST 6415025	Clc1ccccc1NC(=O)C(=O)Nc1ccc2OCCOc2c1	13.5152
T5755302	O=C(N/N=C/c1cccs1)c1n[nH]c2CCCc12	12.8683
ASN 05105863	COc1cc(OC)cc(c1)C(=O)N(Cc1cc2c(C)ccc(C)c2[nH]c1=O)Cc1ccccc1OC	12.8362
5248496	COc1cccc(/C=N/NC(=O)c2ccc(cc2)N2CCCC2=O)c1	11.925
ASN 05548668	CCc1cc2cc3OCCOc3cc2nc1SCC(=O)Nc1ccccc1Cl	11.3657
5326488	COc1ccc(/C=N/NC(=O)c2cccc(F)c2)cc1I	10.4579
ASN 04371229	Cc1cc2cc3OCCOc3cc2nc1SCC(=O)NC1CCCC1	10.3147
5236375	Cc1cccc(CC2S/C(=N/N=C/c3cccc(C)c3)/NC2=O)c1	9.79932
5326501	C/C(=N\NC(=O)c1cccc(F)c1)/c1ccc(Br)s1	9.02201
T5906808	Clc1ccc2c(NCc3ccc(NC(=O)C4CC4)cc3)ncnc2c1	8.64436
SYN 15575266	CN(C)c1ncc(cn1)C(=O)Nc1ccc(Oc2ccc3OCOc3c2)cc1	8.0357
T5960084	Clc1ccc(Cc2cnc(NC(=O)c3cccnc3)s2)cc1	7.93504
ASN 05397535	Oc1ccccc1c1nc2ccc(Cl)cn2c1NCc1ccc2OCOc2c1	7.29518
T6023589	COc1ccc2nc(/C=C/c3cccc(F)c3)sc2c1	6.82634
T6062428	Clc1ccc(Cc2cnc(NC(=O)c3cnccn3)s2)c(Cl)c1	6.51404
T6122485	Brc1ccccc1Cc1cnc(NC(=O)c2cnccn2)s1	6.46831
Mebendazole	COC(=O)Nc1nc2cc(ccc2[nH]1)C(=O)c1ccccc1	6.22118
T6102750	Cc1ccc(/C=N/NC(=O)C2COc3ccccc3O2)s1	5.75856
5302781	CCOC(=O)c1[nH]c(C)c(C(=O)c2cc(F)ccc2F)c1C	5.1633
AST 5939721	COc1ccccc1n1c(SCC(=O)Nc2nccs2)nnc1c1cccnc1	5.05483
T5677451	COc1ccc(cc1OC)/C(=N/Nc1cc[nH+]c2cc(Cl)ccc12)/C	3.80918
AEM 10788782	CC1Oc2nc3ccccc3cc2CN(Cc2ccc(F)cc2)C1=O	3.19488
5319994	Cc1ccc(/C=N\NC(=O)c2cccc(Cl)c2)cc1	3.13455
T5887213	Brc1c[nH]c(c1)C(=O)Nc1ncc(Cc2ccccc2)s1	2.8923
5227890	CC(=O)c1c(C)oc2c1cc(NS(=O)(=O)c1ccc(Cl)cc1)c1ccccc21	2.58962
SYN 15675021	CCCC(NC(=O)c1cnc(SC)nc1)c1ccc2OCCOc2c1	2.16157
SYN 15667948	CC1Cc2cc(NC(=O)c3cc4cccc(C)c4nc3C)ccc2N1C(=O)C	0.649845
5175387	CCOC(=O)Nc1nc2ccccc2[nH]1	0.459095
AEM 10038836	COc1ccc(CNc2c(nc3cnccn23)c2ccccc2O)cc1	0.310437
ASN 03156620	Cc1ccc2cc(CN(CC3CCCO3)C(=S)Nc3ccccc3)c(=O)[nH]c2c1	0.100399
DMSO	CS(=O)C	-0.010179
ASN 05113157	COc1ccc2cc(CN(CC3CCCO3)C(=O)Nc3ccc(Cl)cc3)c(=O)[nH]c2c1	-0.367348
ASN 04394980	Cc1cc2cc3OCOc3cc2nc1SCC(=O)Nc1ccccc1Br	-1.29958
SYN 13194100	CC(Cn1nc2n(c1=O)c1ccccc1cc2C)NC(=O)c1cnn(C)c1C	-1.81149
ASN 06351114	COc1ccccc1NC(=O)N1CCCC1C(=O)Nc1cc(Cl)ccc1OC	-2.00704
ASN 05547071	CCc1cc2cc(OC)ccc2nc1SCC(=O)Nc1cc(C)ccc1OC	-2.45323
T5583794	CCCn1c(NC(=O)C2CN(C(=O)C2)c2ccc3OCCOc3c2)nc2ccccc12	-4.31503
T5851166	Cc1ccc(cc1)C1=NN(C(C1)c1ccccc1F)C(=O)c1ccncc1	-4.52504
ASN 05113329	COc1ccc2cc(CN(Cc3ccccc3Cl)C(=O)Nc3ccccc3OC)c(=O)[nH]c2c1	-4.52504
AEM 08966872	Oc1ccccc1c1nc2cnccn2c1NCc1ccc2OCOc2c1	-6.53895
5338323	C/C(=N\Nc1cc(nc(C)n1)c1ccccc1)/c1ccc(C)cc1	-7.01769
ASN 05545682	CCc1ccc2nc(SCC(=O)Nc3ccccc3N3CCOCC3)c(cc2c1)C#N	-7.6996
SYN 15575469	CSc1ncc(cn1)C(=O)Nc1ccc(Oc2ccc3OCOc3c2)cc1	-8.43724
T6126553	CS(=O)(=O)c1ccc(cc1)C(=O)Nc1ncc(Cc2cccc(Cl)c2Cl)s1	-8.56588
ASN 02254668	COc1ccc2nc(SCC(=O)Nc3ccccc3OC)c(cc2c1)C#N	-9.00657
T6029577	O=c1[nH]c(CSc2ccccc2)nc2sc3CCCc3c12	-9.0925
T6011576	CC(=O)c1c(C)[nH]c(C(=O)Nc2ccc(cc2)N2CCCC2=O)c1C	-9.36333
ASN 09858411	O=C(Nc1ccc2OCCOc2c1)C(=O)Nc1cccc2ncccc12	-9.85613
T5921751	O=C(Nc1sccc1C#N)C1COc2ccccc2C1	-10.4319
ASN 03792032	CC1Cc2ccccc2N1C(=O)CSc1nnc(c2cc3ccccc3cc2O)n1C	-10.5666
5236377	Cc1ccccc1CC1S/C(=N/N=C/c2ccccc2C)/NC1=O	-10.755
ASN 05546059	Cc1cccc2cc(C#N)c(SCC(=O)c3ccc(F)cc3)nc12	-11.1368
6625551	Nc1nc(SCC(=O)NC2CCCCC2)nc2sc3CCCCc3c12	-11.9878
ASN 05545652	CCc1ccc2nc(SCC(=O)Nc3cc(C)ccc3C)c(cc2c1)C#N	-12.1568
T5967494	COc1ccc2cc(CNc3ncnc4[nH]ncc34)ccc2c1	-12.624
ASN 04394959	Cc1cc2cc3OCOc3cc2nc1SCC(=O)Nc1ccccc1C(F)(F)F	-12.8119
T5738394	CCC(C)Cc1c(C)sc2nc([nH]c(=O)c12)SCc1nnc(C)o1	-13.8924
5552857	Clc1c(sc2ccccc12)C(=O)Nc1ncc(Cc2ccccc2)s1	-14.1645
T5577027	COc1ccc(cc1)n1nnnc1SCc1cc2OCOc2cc1Br	-14.7859
ASN 03321993	COc1ccc2nc(SCC(=O)NCCc3ccc(OC)c(OC)c3)c(C)cc2c1	-14.9626
ASN 05546060	Cc1ccc(cc1)C(=O)CSc1nc2c(C)cccc2cc1C#N	-15.1802
T6077976	CC(C)c1nc(C)cc(n1)N1CCN(CC1)C(=O)c1c[nH]nc1c1ccccc1	-15.2211
5326487	COc1ccc(/C=N/NC(=O)c2cccc(F)c2)cc1Br	-16.0713
T5822191	COc1cc(cc2OCCOc12)C(=O)Nc1ccc2N(CCc2c1)C(=O)C	-16.9629
5852371	Cc1cccc(Cc2cnc(NC(=O)c3ccc(Br)cc3)s2)c1	-17.1851
ASN 05114035	Clc1ccccc1NC(=O)N(Cc1cccs1)Cc1cc2cc3OCCOc3cc2[nH]c1=O	-17.832
5137329	Clc1ccc(OS(=O)(=O)c2ccc(cc2)N2CCCC2=O)cc1	-18.3743
T5973853	Cc1cnc(cn1)C(=O)Nc1ncc(Cc2ccc(C)c(Cl)c2)s1	-19.1993
5304883	COc1cc(cc(OC)c1OC)C(=O)Nc1ccc2CCc3ccccc3Nc2c1	-20.112
ASN 03365348	Cc1cc2[nH]c(=O)c(CN(CC3CCCO3)C(=S)Nc3ccccc3)cc2cc1C	-20.33
ASN 03432489	CCc1ccc2nc(SCC(=O)Nc3ccccc3C)c(C)cc2c1	-20.4574
ASN 05113997	Clc1ccc(NC(=O)N(CC2CCCO2)Cc2cc3cc4OCCOc4cc3[nH]c2=O)cc1	-20.7091
5378429	Cc1nc2ccc(Cl)cn2c1C(=O)N/N=C/c1ccc(C)cc1	-21.1896
T5654678	COc1ccccc1N1CC[NH+](Cc2c(nc3sccn23)c2ccccc2)CC1	-21.9232
ASN 05588513	CCOc1ccc2nc(SCC(=O)Nc3ccccc3CC)c(cc2c1)C#N	-22.2194
T5595348	Clc1c(cnn(c2nc3ccccc3[nH]2)c1=O)N1CCC(=CC1)c1ccccc1	-22.9104
6601798	Oc1ccccc1/C=N/N=C\1/NC(=O)C(Cc2cc(ccc2Cl)C(F)(F)F)S1	-22.9879
T6075414	CC(C)n1ncc2cc(cnc12)C(=O)Nc1cccc2CCCCc12	-23.4939
T5975147	CCN(CC)c1ccc(NC(=O)C2CCC=CC2)cc1	-23.8781
ASN 05588684	CCc1ccccc1NC(=O)CSc1nc2cc3OCCOc3cc2cc1C#N	-23.9185
ASN 05588687	Cc1ccc(NC(=O)CSc2nc3cc4OCCOc4cc3cc2C#N)c(C)c1	-24.0526
ASN 05545654	CCc1ccc2nc(SCC(=O)Nc3ccccc3OC)c(cc2c1)C#N	-25.0345
5754791	CCOc1ccc(cc1)S(=O)(=O)Nc1cc(Br)c2oc(C)c(C(=O)C)c2c1	-25.4419
5542909	Clc1ccc(/C=N\NC(=O)COc2ccccc2CC=C)cc1	-25.857
Fenbendazole	COC(=O)Nc1nc2cc(Sc3ccccc3)ccc2[nH]1	-27.1088
T5718894	Clc1ccccc1Cc1cnc(NC(=O)c2ccncc2)s1	-29.376
T5734552	COc1ccc2nc(/C=C/c3cccnc3)sc2c1	-29.9235
T6117610	Cc1cnc(cn1)C(=O)Nc1ncc(Cc2ccc(cc2)C#N)s1	-30.3795
ASN 03321946	COc1ccc(OC)c(NC(=O)CSc2nc3ccc(OC)cc3cc2C)c1	-30.7384
T5600658	CS(=O)(=O)N1CCCc2cc(ccc12)C(=O)Cn1cnc2scc(c2c1=O)c1ccc(F)cc1	-30.918
T6144411	COc1cc(cc2OCOc12)C1NC(=O)c2ccccc2N1	-31.5449
T6134563	C(Cc1ccccc1)c1nc2c3ccccc3ncn2n1	-31.8603
SYN 15666890	Cc1nn(C)c(C)c1c1cc([nH]n1)C(=O)Nc1ccccc1OCC=C	-31.8909
5625039	O=c1[nH]c(/C=C/c2ccccc2)nc2sc3CCCCc3c12	-32.9004
T6042975	O=C1CCCN1Cc1ccc(cc1)c1ccccc1CNc1ncccn1	-32.9004
ASN 02563252	COc1ccccc1NC(=O)CSc1nnc(c2cc(OC)c(OC)c(OC)c2)n1C	-33.1349
ASN 04888726	CCN(CC)c1ccc(NC(=O)CSc2nc(CC)nc3ccccc23)cc1C	-33.9896
SYN 13194702	Cc1ccc2cc(C)c3nn(CCNC(=O)c4ccncc4)c(=O)n3c2c1	-34.1997
T6004352	Cc1cc2nc(/C=C/c3cccnc3)sc2cc1C	-34.3247
T6114925	Cc1ccc(cn1)C(=O)Nc1ncc(Cc2ccccc2Br)s1	-35.9339
5541673	COc1cc(CNc2ccc(Br)cc2)cc(OC)c1OC	-37.2572
T5789343	COc1cccc2sc(NC(=O)C3CN(C(=O)C)c4ccccc4O3)nc12	-38.0703
T5836001	Cc1ccc(cc1)/C=N/NC(=O)c1ccc2OCOc2c1	-38.5262
AST 5545801	CC(C)c1ccc2nc(SCC(=O)Nc3cc(C)ccc3C)c(cc2c1)C#N	-39.0845
ASN 04672738	COc1ccc(OCc2nnc(SCC(=O)N)n2c2cc(C)ccc2C)cc1	-39.4392
T6126001	O=C(Nc1ncc(Cc2ccc(cc2)C#N)s1)c1ccc2ncsc2c1	-40.1091
T6107451	Fc1ccccc1C(=O)Nc1ccc(nc1)N1CCc2sccc2C1	-40.3559
SYN 13194701	Cc1ccc2cc(C)c3nn(CCNC(=O)c4cccnc4)c(=O)n3c2c1	-40.383
T5611889	COc1cc2CC[NH+](CC(O)c3ccccc3)C(c3cccs3)c2cc1OC	-40.383
ASN 04393098	Cc1cc(NC(=O)CSc2nnc3c(C)cc4c(C)ccc(C)c4n23)no1	-40.659
AST 5545756	COc1ccc(C)cc1NC(=O)CSc1nc2ccc(cc2cc1C#N)C(C)C	-41.2958
AEM 10367485	COc1ccc(cc1)C1(CC1)C(=O)NC(C)c1[nH]nc(n1)c1ccncc1	-41.3313
SYN 17927798	CCC1[NH+](Cc2ccc(cc2)N2CCCC2=O)CCc2sccc12	-43.7448
AST 5942053	Cc1csc(NC(=O)CSc2nnc(c3cccnc3)n2c2ccccc2C)n1	-45.1257
T5884601	Cc1cccc(c1)N1CCN(CC1)C(=O)c1cc(Cl)ccc1Cl	-45.7011
ASN 02538884	Cc1cccc2cc3c(N)c(sc3nc12)C(=O)N1CCCc2ccccc12	-46.411
ASN 02170684	Cc1ccc2cc(C#N)c(SCC(=O)c3ccccc3)nc2c1	-46.8877
T5878385	O=C(N1CCC(=CC1)c1c[nH]c2ccccc12)c1cccnc1N1CCCC1	-49.4391
ASN 04395071	COc1ccc(CCNC(=O)CSc2nc3cc4OCOc4cc3cc2C)cc1OC	-49.9083
T5869460	Clc1cccc(c1)N1CCN(CC1)C(=O)c1cncn1c1ccccc1	-49.9499
ASN 01516512	COc1ccc(Cl)cc1NC(=O)CSc1nnc(c2ccncc2)n1c1ccccc1	-50.8652
AST 5941606	COc1ccccc1n1c(SCC(=O)Nc2nc(C)cs2)nnc1c1cccnc1	-50.9723
ASN 03778279	CCc1ccccc1NC(=S)N(CCCO)Cc1cc2cc(C)cc(C)c2[nH]c1=O	-51.6122
T5981263	Cc1ccc2nc(NC(=O)c3cc(Br)c[nH]3)sc2c1	-51.9243
T5906514	CCOc1c(Cl)cc(cc1OC)C(=O)N1CCN(CC1)c1cccc(C)c1	-52.7906
ASN 05941236	CCCn1c(SCC(=O)Nc2ccccc2OC)nnc1c1cccnc1	-56.1195
T6145342	Clc1ccccc1c1ccc(C[NH+]2CCN(CC2)c2ccc(cn2)C#N)s1	-56.1771
5554099	Cc1ccc(/C=N\NC(=O)COc2ccccc2Br)c(C)c1	-56.453
ASN 05113195	COc1ccc2cc(CN(Cc3cccs3)C(=O)Nc3ccccc3Cl)c(=O)[nH]c2c1	-57.2208
AST 5940462	COc1ccccc1NC(=O)CSc1nnc(c2cccnc2)n1c1ccccc1C	-57.2208
T5828154	COc1cn(nc1C(=O)N1CCc2ccccc12)c1ccccc1	-57.3944
T5700625	Cc1ccc(NC(=O)c2cc(F)c(Cl)cc2Cl)nc1	-57.6282
5227882	CC(=O)c1c(C)oc2c1cc(NS(=O)(=O)c1ccc(C)cc1)c1ccccc21	-58.8505
T6099168	Brc1ccccc1Cc1cnc(NC(=O)c2cccnc2)s1	-64.0895
ASN 05548417	CCc1ccccc1NC(=O)CSc1nc2cc3OCOc3cc2cc1CC	-64.9618
Vinblastine	O([C@@H]1[C@]2([C@@H]3N(CC[C@@]43[C@@H](N(c3c4cc(c(OC)c3)[C@]3(C[C@@H]4C[C@](O)(CN(C4)CCc4c3[nH]c3c4cccc3)CC)C(=O)OC)C)[C@@]1(O)C(=O)OC)CC=C2)CC)C(=O)C	-74.6552
T5848232	CC(=O)c1c(C)cc(C)c(CSc2nnc(c3ccc(F)cc3)n2C)c1C	-75.8671
T5788025	O=C(Nc1nc2ccccc2[nH]1)c1cccc2ccccc12	-76.3695
T5870839	Cc1ccc(cn1)C(=O)Nc1nc2ccc(Cl)cc2s1	-82.8883
T5685516	COc1cccc(c1)N1CCN(CC1)C(=O)c1cc(nc2ccccc12)C1CC1	-85.089
T6091820	Cc1cnc(cn1)C(=O)Nc1ncc(Cc2cccc(C)c2Cl)s1	-85.7403
T5614678	O=C1NC(Nc2ccccc12)c1c([nH]c2ccccc12)c1ccccc1	-92.0567
ASN 05547116	CCc1cc2cc(OC)ccc2nc1SCC(=O)Nc1ccccc1Cl	-96.6112
T5818924	Clc1ccc(Cc2cnc(NC(=O)c3cnccn3)s2)cc1	-97.5554
Colchicine	CC(=O)NC1CCC2=CC(=C(C(=C2C3=CC=C(C(=O)C=C13)OC)OC)OC)OC	-106.451
T5615961	COc1cccc(c1)N1CCN(CC1)C(=O)c1cn(nc1c1cccnc1)c1ccccc1	-110.703
T5807000	Cc1ccc(cc1)c1csc2ncn(CC3CCCCO3)c(=O)c12	-190.486
