# Supplementary material for: Large-Scale Chemical Similarity Networks for Target Profiling of Compounds Identified in Cell-Based Chemical Screens
Source: PLoS Comput Biol. 2015 Mar 31;11(3):e1004153. doi: 10.1371/journal.pcbi.1004153 (PMC4380459; doi:10.1371/journal.pcbi.1004153)
Supplement: S7 Fig — All subtypes within each of the 4 predicted target categories (SCD, PTPN, ABL1 and TUBB) were searched within the MitoCheck database. Note that all four target categories display diverse mitotic phenotypes by siRNA knockdown. (PDF) [file pcbi.1004153.s007.pdf]

nuclei stay close together  
strange nuclear shape  
segregation problems  
cell migration  
metaphase delay  
cell death  
metaphase alignment problems  
pulsating nuclei  
small nucleus  
prometaphase delay  
condensation followed by decon-  
densation  
large nucleus  
failure in decondensation  
condensation without mitosis  
binuclear  
polylobed  
large  
dynamic changes  
mitotic delay  
grape  
migration (speed)  
migration (distance)  
increased proliferation  
strong inhibition of secretion  
mild inhibition of secretion  
inhibition of secretion  
enhanced secretion  
altered gln30 morphology  
altered cop1 morphology  
altered cop1 morphology  
retention of shd(haspb)-gfp  
retention of shd(yes)-mcherry  
reduction in ir-induced 53ap1  
reduction in ir-induced 53ap1  
accumulation of gfp-rnf168 on

SCD

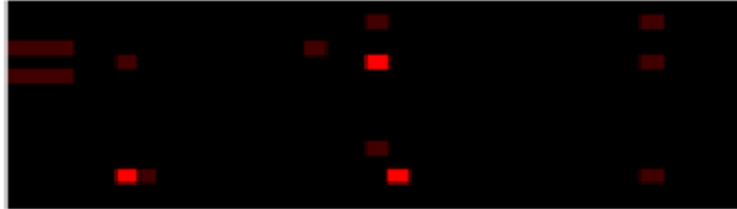

PTPN

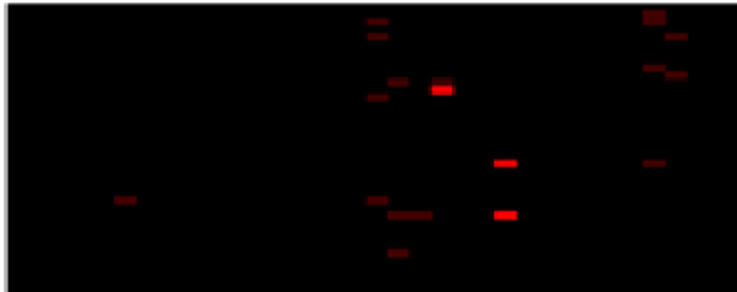

ABL1

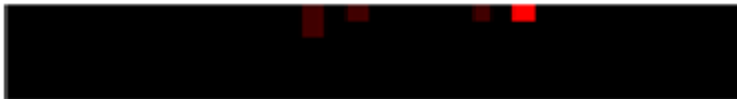

TUBB

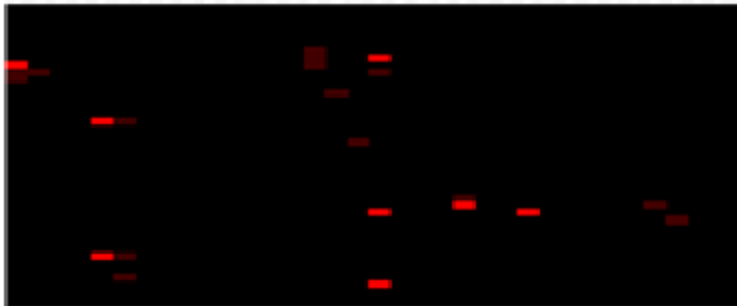

SCD

FADS2

SCD5

PTPRC

PTPN7

PTPN12

PTPN22

## ACP1

ABL1

TUBA1A

TUBB

TUBA4A

TUBB3

TUBA3D

TUBA1A  
TUBP1

TUBB4

TUBB3

TUBB6
