# Supplementary material for: Large-Scale Chemical Similarity Networks for Target Profiling of Compounds Identified in Cell-Based Chemical Screens
Source: PLOS journal article supplement (doi:10.1371/journal.pcbi.1004153), 2015-03-31
Supplement: S15 (10.1371/journal.pcbi.1004153.s015) [file journal.pcbi.1004153.s015]

| Category          | Parameter                                | Description                                                                                                              |
|-------------------|------------------------------------------|--------------------------------------------------------------------------------------------------------------------------|
| Assay             | Type of assay                            | Cell-based                                                                                                               |
|                   | Target                                   | Cell cycle modulators                                                                                                    |
|                   | Primary measurement                      | Cell cycle profile, detection of G2/M arrest                                                                             |
|                   | Key reagents                             | Vybrant DyeCycle Green Stain (Invitrogen)<br>P-H3-488 Antibody (Cell Signaling)                                          |
|                   | Assay protocol                           | See Extended Experimental Procedures                                                                                     |
| Library           | Library size                             | 90,000 compounds                                                                                                         |
|                   | Library composition                      | Drug-like molecules                                                                                                      |
|                   | Source                                   | UCLA Molecular Screening Shared Resource                                                                                 |
| Screen            | Format                                   | 384-well plates                                                                                                          |
|                   | Concentration(s) tested                  | 10 $\mu$ M, <1% DMSO                                                                                                     |
|                   | Plate controls                           | Internal controls DMSO, Taxol                                                                                            |
|                   | Reagent/ compound dispensing system      | Biomek FX (Beckman Coulter) and Multidrop 384 (Thermo LabSystems) liquid handlers                                        |
|                   | Detection instrument and software        | Acumen eX3 (TTP Labtech)                                                                                                 |
|                   | Assay validation/QC                      | Z' score 0.4932 $\pm$ 0.0953                                                                                             |
|                   | Correction factors                       |                                                                                                                          |
|                   | Normalization                            | To internal controls DMSO and Taxol                                                                                      |
| Post-HTS analysis | Hit criteria                             | >70% G2/M arrest                                                                                                         |
|                   | Hit rate                                 | 2.35%                                                                                                                    |
|                   | Additional assay(s)                      | Retesting compounds, counter screen for P-H3-488 antibody positives                                                      |
|                   | Confirmation of hit purity and structure | Compounds were repurchased from MolPort and compound structure and purity were verified analytically using LC/MS and NMR |
